# Supplementary material for: Na0.76V6O15@Boron Carbonitride Nanotube Composites as Cathodes for High-Performance Lithium-Ion Capacitors
Source: MDPI journal article supplement (doi:10.3390/cryst12050597), 2022-04-24
Supplement: s1 [file s1]

Supplementary Materials

# Na<sub>0.76</sub>V<sub>6</sub>O<sub>15</sub>@Boron Carbonitride Nanotube Composites as Cathodes for High-Performance Lithium-Ion Capacitors

Deqin Xu <sup>1</sup>, Hehe Jiang <sup>2</sup>, Zhenyan Liang <sup>1</sup>, Zhen Kong <sup>1</sup>, Shengfu Liu <sup>1</sup>, Lequan Deng <sup>1</sup>, Yongliang Shao <sup>1,3,\*</sup>, Yongzhong Wu <sup>1,3</sup> and Xiaopeng Hao <sup>1,3</sup>

<sup>1</sup> State Key Lab of Crystal Materials, Shandong University, Jinan 250100, China; dqxu@mail.sdu.edu.cn (D.X.); 201712427@mail.sdu.edu.cn (Z.L.); kongzhen@mail.sdu.edu.cn (Z.K.); 201912615@mail.sdu.edu.cn (S.L.); lqdeng@mail.sdu.edu.cn (L.D.); wuyz@sdu.edu.cn (Y.W.); xphao@sdu.edu.cn (X.H.)

<sup>2</sup> Innovative Institute of Chinese Medicine and Pharmacy, Shandong University of Traditional Chinese Medicine, Jinan 250355, China; 60230063@sducm.edu.cn

<sup>3</sup> Department of Materials Science and Engineering, Qilu University of Technology (Shandong Academy of Science), Jinan 250353, China

\* Correspondence: ylsao@sdu.edu.cn

**Citation:** Xu, D.; Jiang, H.; Liang, Z.; Kong, Z.; Liu, S.; Deng, L.; Shao, Y.; Wu, Y.; Hao, X. Na<sub>0.76</sub>V<sub>6</sub>O<sub>15</sub>@Boron Carbonitride Nanotube Composites as Cathodes for High-Performance Lithium-Ion Capacitors. *Crystals* **2022**, *12*, 597. <https://doi.org/10.3390/cryst12050597>

Academic Editors: Ingo Dierking and Xiaofei Yang

Received: 7 March 2022

Accepted: 21 April 2022

Published: 24 April 2022

**Publisher's Note:** MDPI stays neutral with regard to jurisdictional claims in published maps and institutional affiliations.

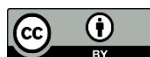

**Copyright:** © 2022 by the authors. Licensee MDPI, Basel, Switzerland. This article is an open access article distributed under the terms and conditions of the Creative Commons Attribution (CC BY) license (<http://creativecommons.org/licenses/by/4.0/>).

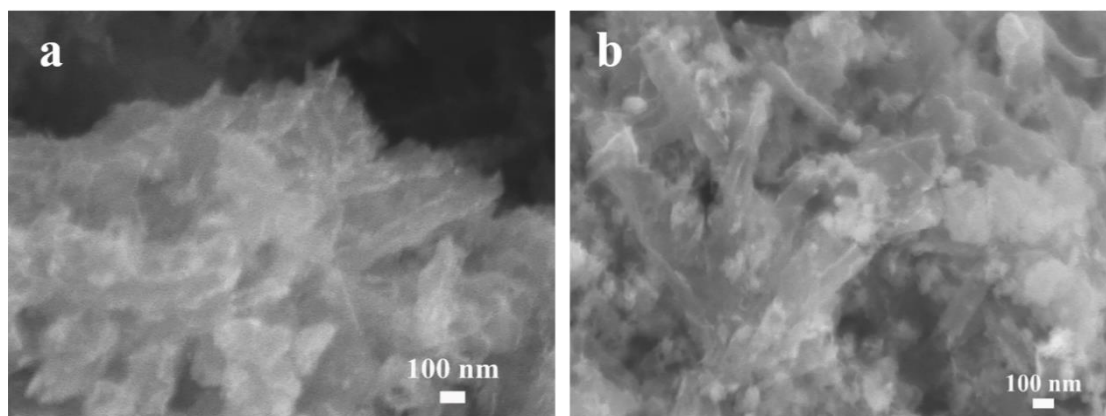

**Figure S1.** (a) SEM image of the NaVO@BCN-3; (b) SEM image of the NaVO@BCN-2.

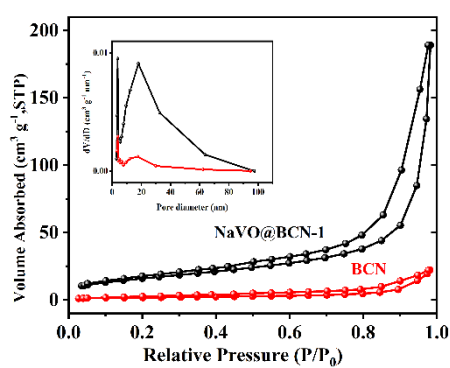

**Figure S2.** Nitrogen adsorption/desorption isotherms of the NaVO@BCN-1 and BCN; inset: the pore size distributions.

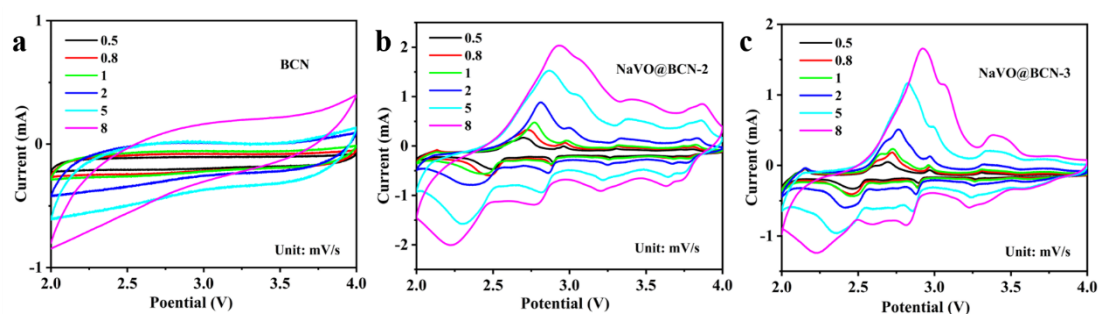

**Figure S3.** CV curves of the BCN nanotubes and NaVO@BCN: (a) BCN nanotubes; (b) NaVO@BCN-2; (c) NaVO@BCN-3.

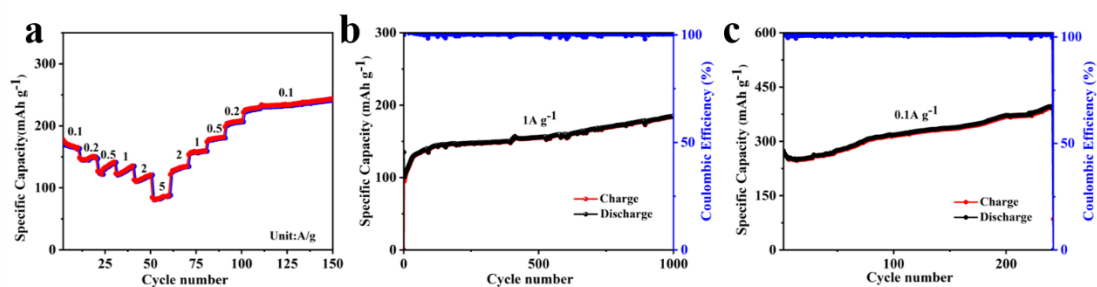

**Figure S4.** Rate and cycling performance of HC; (a) rate performance at various current densities; (b) cycling performance at 1 A g<sup>-1</sup> within 1000 cycles; (c) cycling performance at 0.1 A g<sup>-1</sup> within 240 cycles.

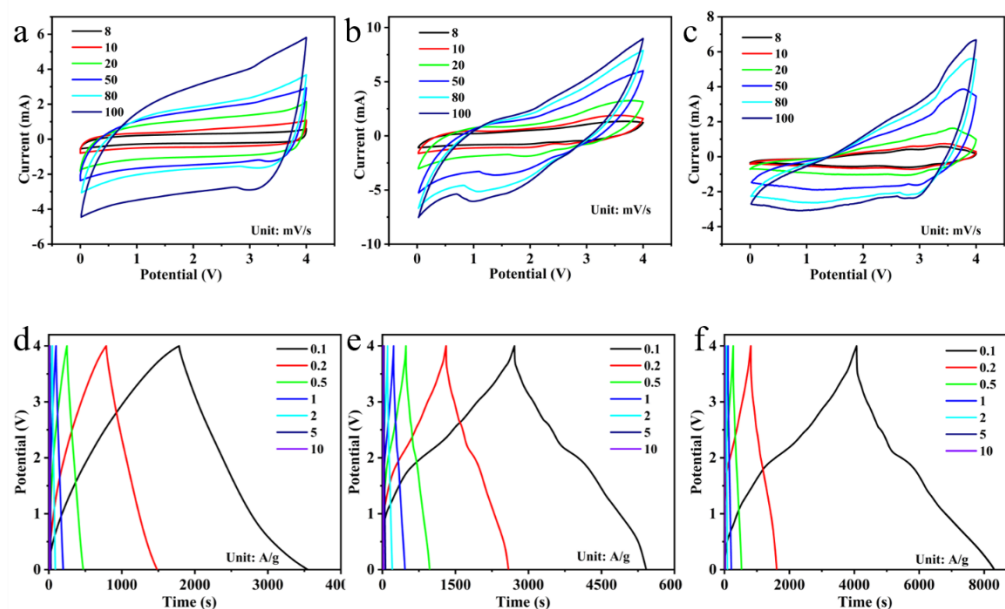

**Figure S5.** Electrochemical performances of the LICs. CV curves at different scan rates: (a) BCN nanotubes; (b) NaVO@BCN-2; (c) NaVO@BCN-3. GCD curves at various current densities: (d) BCN nanotubes; (e) NaVO@BCN-2; (f) NaVO@BCN-3.

**Table S1.** Electrochemical performance of different cathode electrodes and the relevant LICs.

| LICs                                                                            | Max energy density (Wh kg <sup>-1</sup> ) | Power density (W kg <sup>-1</sup> ) | Voltage (V) | Ref.      |
|---------------------------------------------------------------------------------|-------------------------------------------|-------------------------------------|-------------|-----------|
| BCNNTs//LiNbO <sub>3</sub> @GA                                                  | 148                                       | 200                                 | 0-4         | [42]      |
| AC//V <sub>2</sub> O <sub>5</sub> @CNT                                          | 40                                        | 210                                 | 0-2.7       | [46]      |
| NS-DPC                                                                          | 216                                       | 400                                 | 0-4         | [47]      |
| //Ti <sub>3</sub> C <sub>2</sub> T <sub>x</sub> @Fe <sub>2</sub> O <sub>3</sub> |                                           |                                     |             |           |
| LMO-MSs@GNSs//AC                                                                | 38.8                                      | 12.6                                | 0-2.3       | [48]      |
| Li <sub>3</sub> V <sub>2</sub> (PO <sub>4</sub> ) <sub>3</sub> /C//AC           | 53.2                                      | 70                                  | 0-2.7       | [49]      |
| NaVO@BCN//HC                                                                    | 238.7                                     | 200                                 | 0-4         | This work |
